# Supplementary material
Source: publisher site journal article supplement (https://www.dovepress.com/article/549917)
Supplement: Supplementary file 1 [file 549917%20Revised%20_Supplementary%20file.docx]

**The full uncropped Gels and Blots images**

**
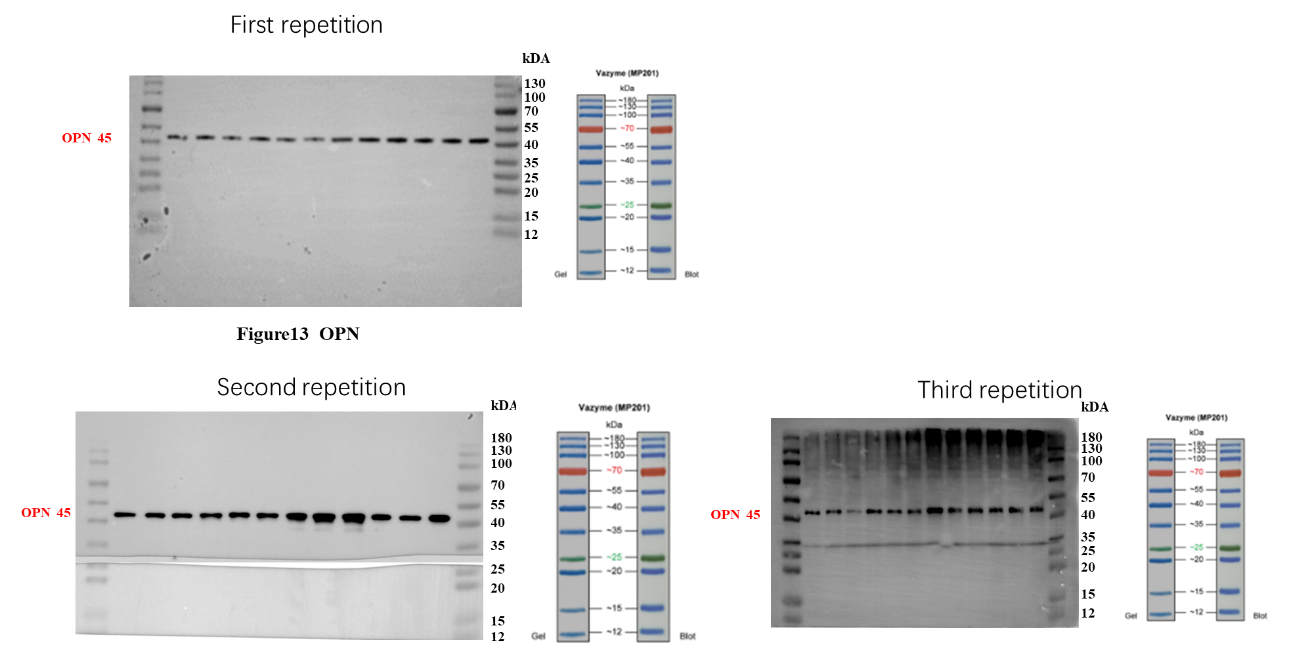
**

**Figure13 OPN**


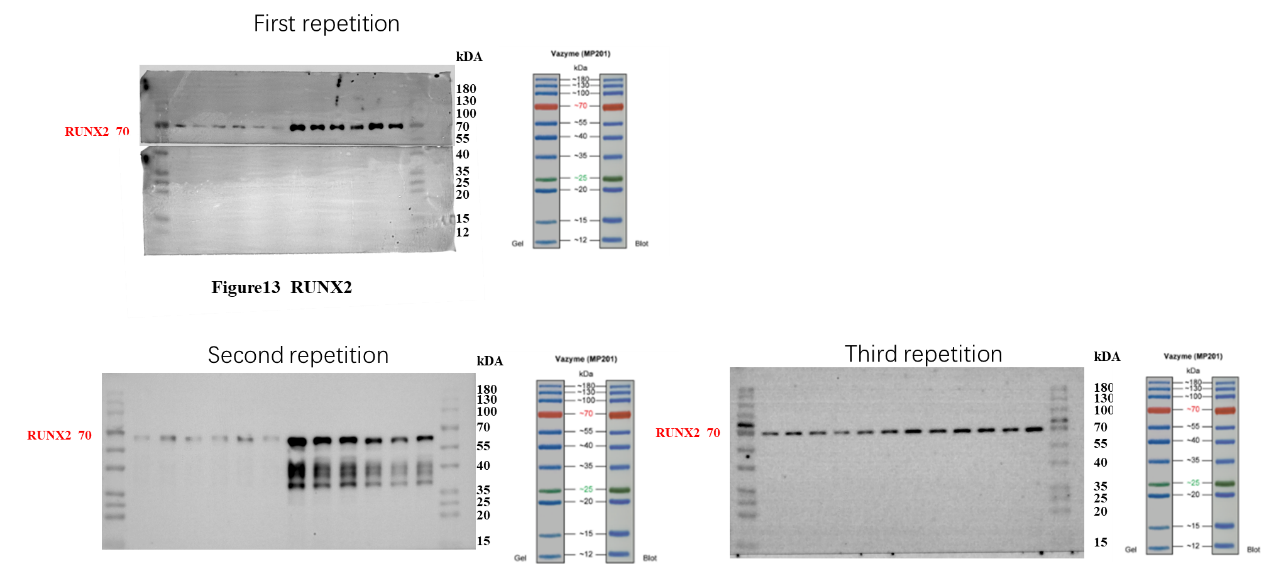


**Figure13 RUNX2**

**
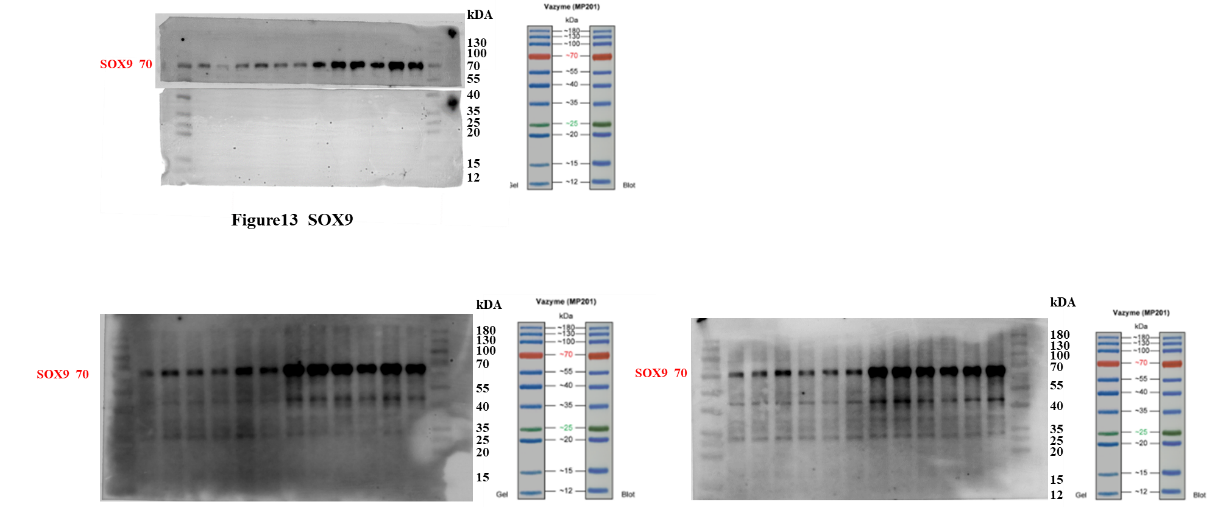
**

**Figure13**  **SOX9**


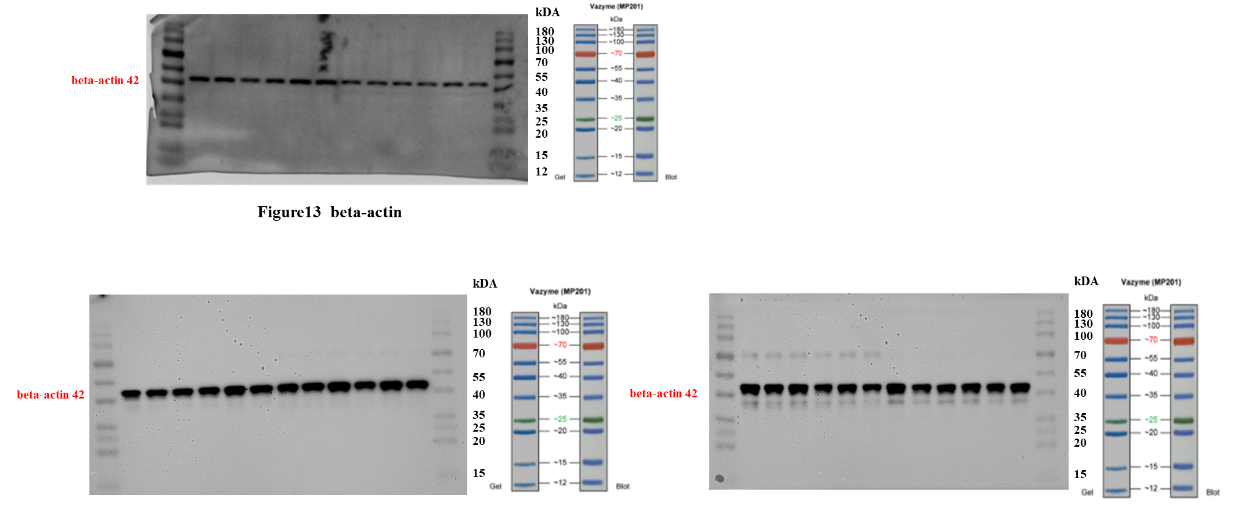


**Figure13 Beta-actin**

**
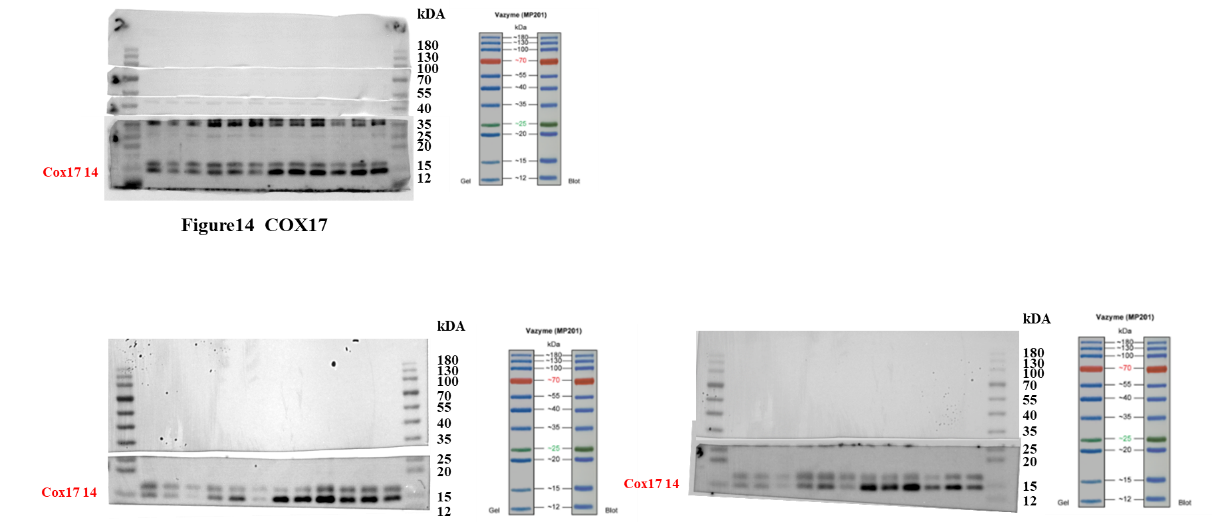
**

**Figure14 COX17**


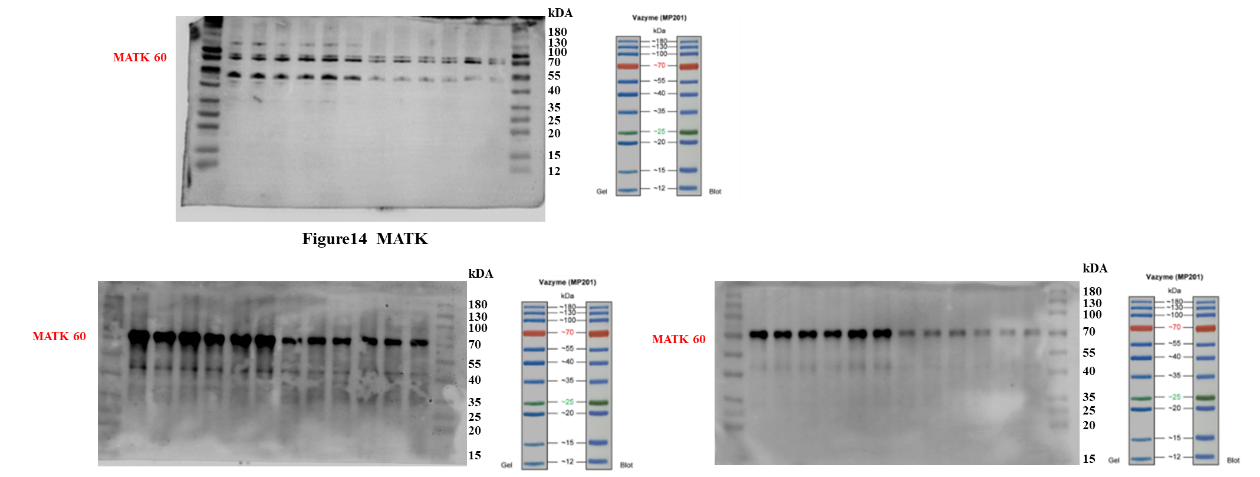


**Figure14 MATK**

**
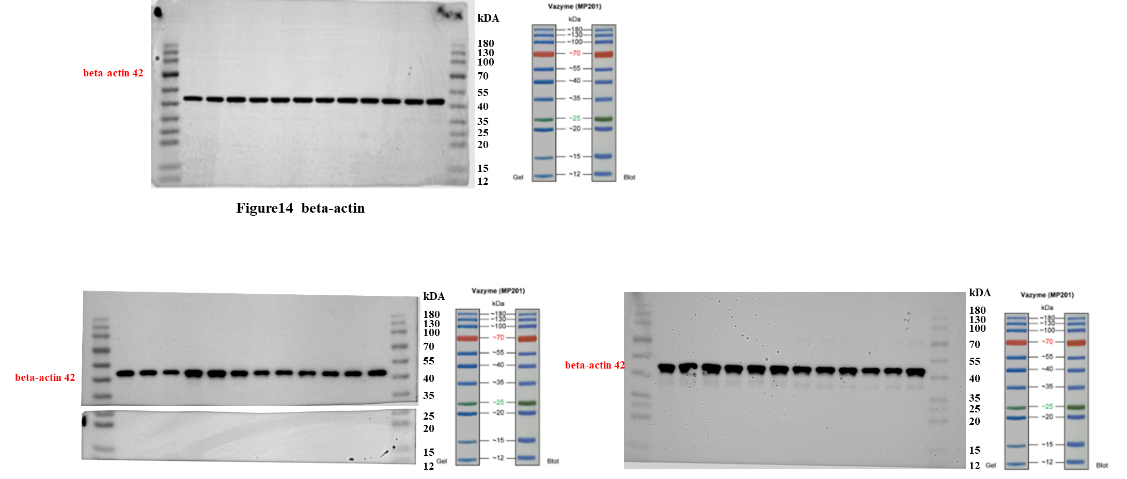
**

**Figure14 Beta-actin**
